# Supplementary material for: Using Likelihood-Free Inference to Compare Evolutionary Dynamics of the Protein Networks of H. pylori and P. falciparum
Source: PubMed Central journal article supplement (PMC2098858; doi:10.1371/journal.pcbi.0030230), 2007-11-30

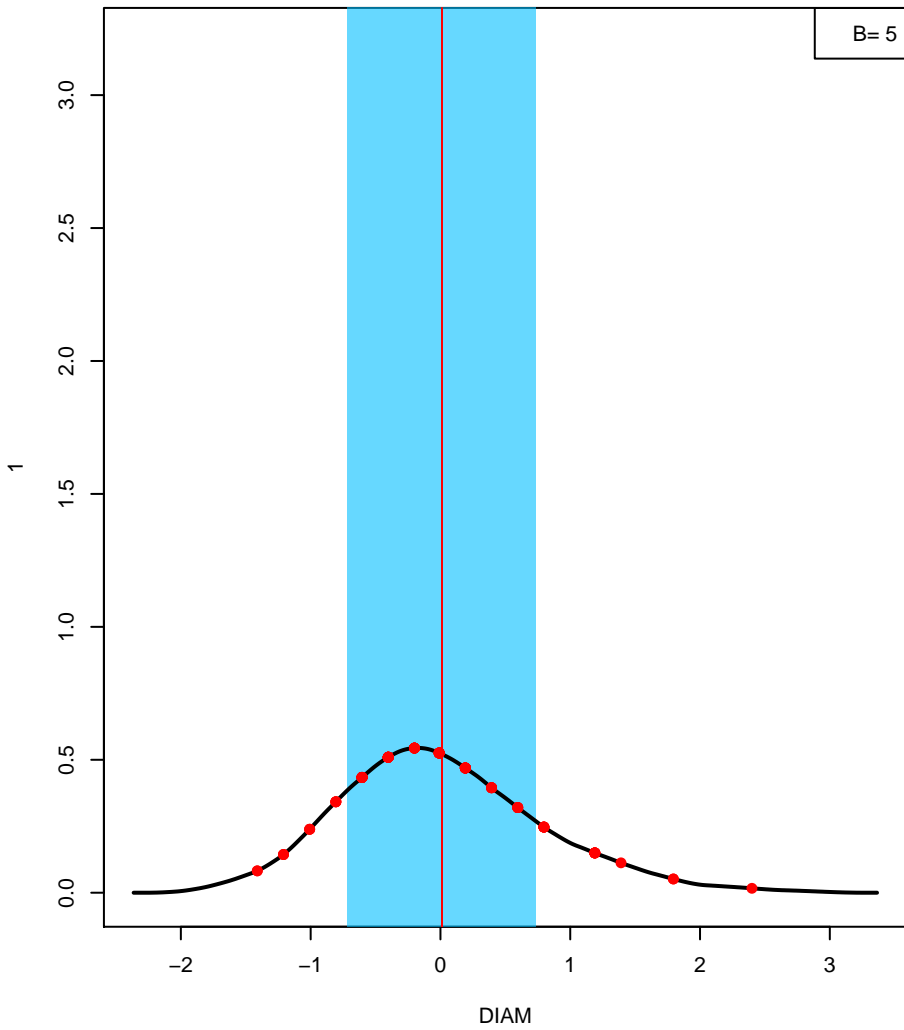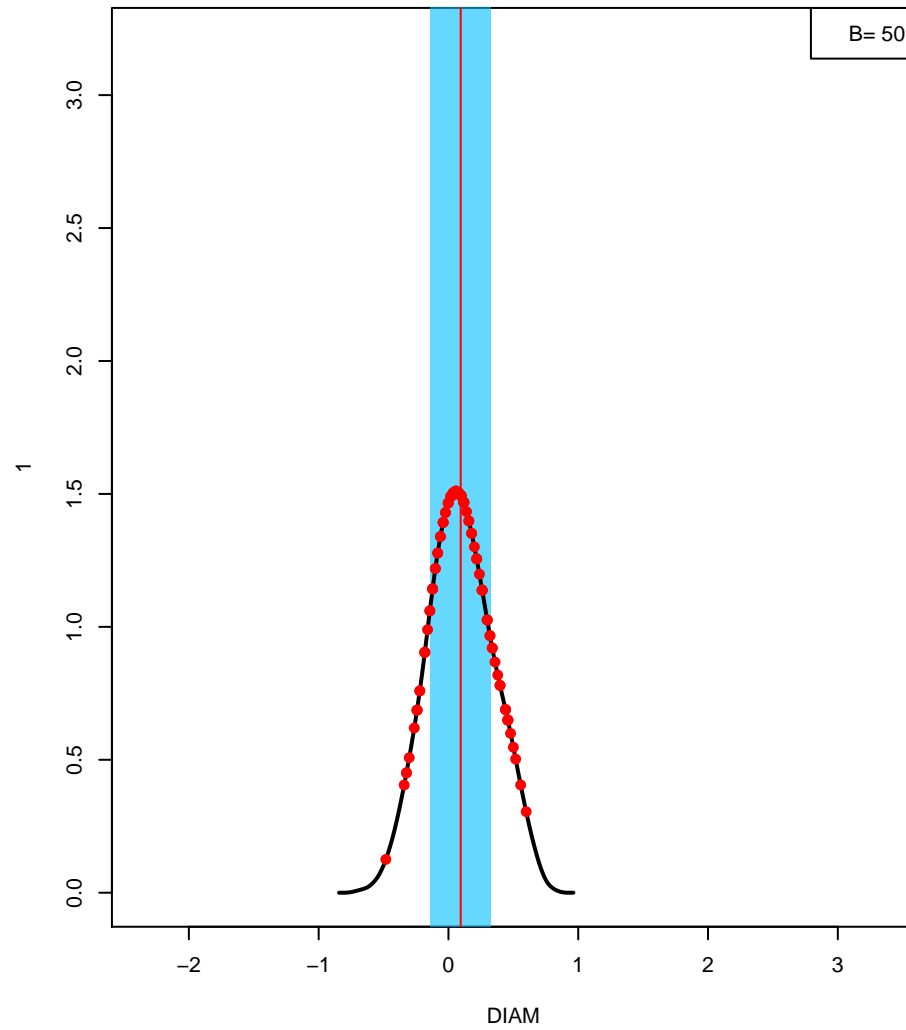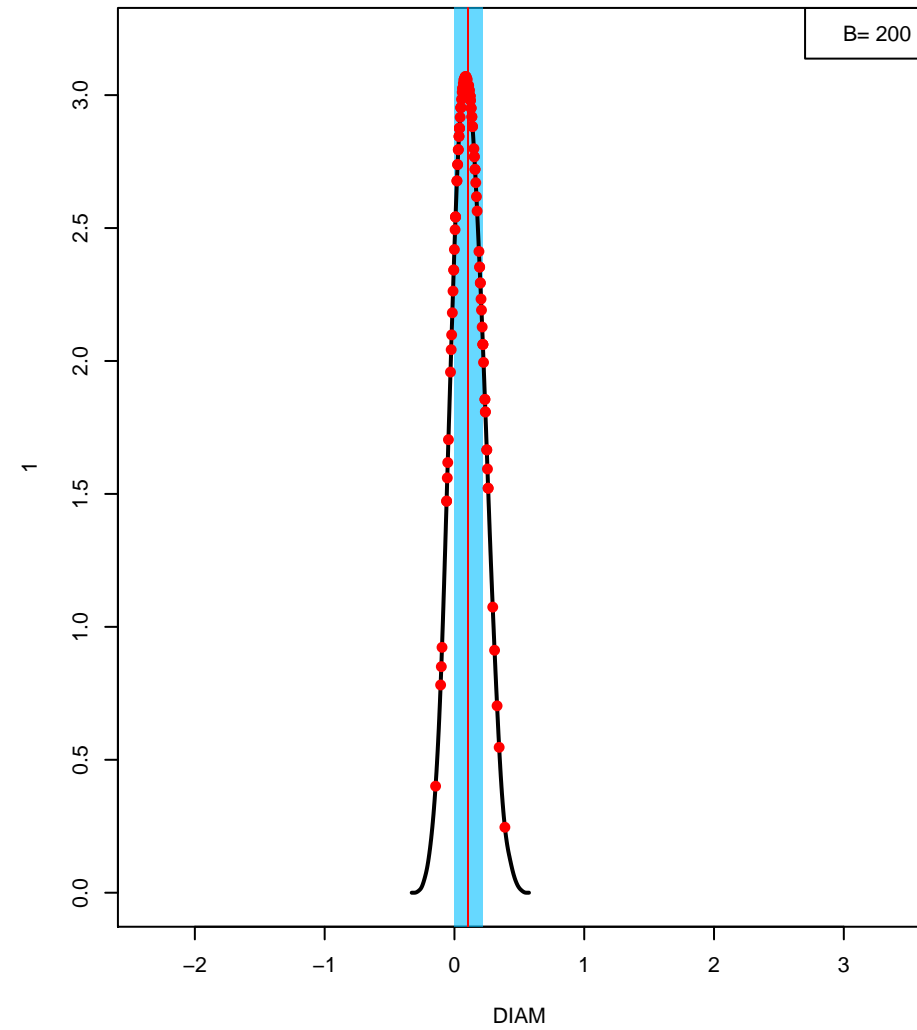

Supplement: pcbi.0030230.sg003.pdf [file pcbi.0030230.sg003.pdf]
